1 **Splice Factor Polypyrimidine tract-binding protein 1 (Ptbp1) is Required for Immune Priming of the**  
2 **Endothelium in Atherogenic Disturbed Flow Conditions**

3  
4 Jessica A Hensel<sup>1</sup>, Sarah-Anne E Nicholas<sup>1</sup>, Evan R Jellison<sup>2</sup>, Amy L Kimble<sup>1</sup>, Antoine Menoret<sup>2</sup>, Manabu  
5 Ozawa<sup>3</sup>, Annabelle Rodriguez-Oquendo<sup>1</sup>, Anthony T Vella<sup>2</sup>, Patrick A Murphy<sup>1</sup>

6  
7 <sup>1</sup> Center for Vascular Biology, UCONN Health, Farmington, Connecticut, United States

8 <sup>2</sup> Department of Immunology, UCONN Health, Farmington, Connecticut, United States

9 <sup>3</sup> Institute of Medical Science, University of Tokyo, Tokyo, Japan

10

11 Corresponding Author

12 Patrick A. Murphy, Ph.D.

13 Assistant Professor

14 Center for Vascular Biology & Calhoun Cardiology Center

15 University of Connecticut Medical School

16 263 Farmington Avenue

17 Farmington, CT 06030

18 Tel: 860-679-2829

19 Email : [pamurphy@uchc.edu](mailto:pamurphy@uchc.edu)

## 20 Graphical Abstract

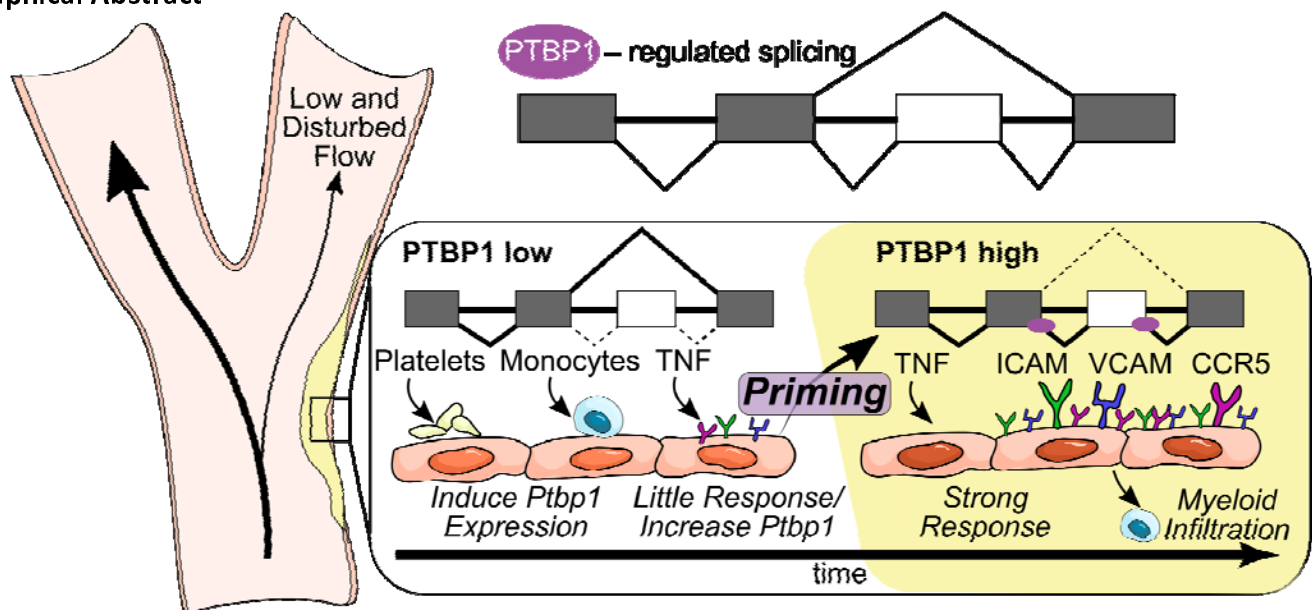

21

22 *Plaque forms in low and disturbed flow regions of the vasculature, where endothelial cells are “primed” to*  
23 *respond to cytokines (e.g. TNF $\alpha$ ) with elevated levels of cell adhesion molecules via the NF $\kappa$ B signaling*  
24 *pathway. We show that the splice factor Ptp1 (purple) mediates priming. Ptp1 is induced in endothelial*  
25 *cells by platelet recruitment, promoting priming and subsequent myeloid cell infiltration into plaque.*

26 *Mechanistically, Ptp1 regulates splicing of genes involved in the NF $\kappa$ B signaling pathway and is required*  
27 *for efficient nuclear translocation of NF $\kappa$ B in endothelial cells. This provides new insight into the molecular*  
28 *mechanisms underlying an endothelial priming process that reinforces vascular inflammatory responses.*

29

## 30 Abstract

31 NF $\kappa$ B mediated endothelial activation drives leukocyte recruitment and atherosclerosis, in part through  
32 upregulation of adhesion molecules Icam1 and Vcam. The endothelium is “primed” for cytokine activation  
33 of NF $\kappa$ B by exposure to low and disturbed blood flow (LDF) *in vivo* and by LDF or static conditions in  
34 cultured cells. While priming leads to an exaggerated expression of Icam1 and Vcam following cytokine  
35 stimulation, the molecular underpinnings are not fully understood. We showed that alternative splicing of  
36 genes regulating NF $\kappa$ B signaling occurs during priming, but the functional implications of this are not  
37 known. We hypothesize that the regulation of splicing by RNA-binding splice factors is critical for priming.  
38 Here, we perform a CRISPR screen in cultured aortic endothelial cells to determine whether splice factors  
39 active in the response to LDF participate in endothelial cell priming. Using Icam1 and Vcam induction by  
40 TNF $\alpha$  stimulation as a marker of priming, we identify polypyrimidine tract binding protein (Ptp1) as a  
41 required splice factor. Ptp1 expression is increased and its motifs are enriched nearby alternatively spliced  
42 exons in endothelial cells exposed to LDF *in vivo* in a platelet dependent manner, indicating its induction by  
43 early innate immune cell recruitment. At a mechanistic level, deletion of Ptp1 inhibited NF $\kappa$ B nuclear  
44 translocation and transcriptional activation. These changes coincided with altered splicing of key  
45 components of the NF $\kappa$ B signaling pathway that were similarly altered in the LDF response. However, these  
46 splicing and transcriptional changes could be restored by expression of human PTBP1 cDNA in Ptp1  
47 deleted cells. *In vivo*, endothelial specific deletion of Ptp1 reduced myeloid cell infiltration at regions of  
48 LDF in atherosclerotic mice. In human coronary arteries, PTBP1 expression correlates with expression of  
49 TNF pathway genes and amount of plaque. Together, our data suggest that Ptp1, which is activated in the  
50 endothelium by innate immune cell recruitment in regions of LDF, is required for priming of the  
51 endothelium for subsequent NF $\kappa$ B activation and myeloid cell recruitment in vascular inflammation.

## 52 Introduction

53 Atherosclerosis is a disease characterized by chronic sterile inflammation, driven by leukocyte  
54 recruitment to regions of low and disturbed flow (LDF) in arteries. In these regions, endothelial expression  
55 of leukocyte adhesion molecules, such as Icam1, Vcam, and P-, E- and L-selectins, and cytokines, such as  
56 CCL2 (MCP1) and CCL5 (RANTES), mediate leukocyte recruitment<sup>1,2</sup>. Complete inhibition of these  
57 molecules, or the NFκB signaling pathway suppresses leukocyte recruitment to the endothelium, and  
58 reduces both acute and chronic inflammation in atherosclerotic plaque<sup>3</sup>. The expression of these  
59 molecules is tightly regulated in the endothelium, primarily by NFκB signaling. Activity of this pathway and  
60 expression of downstream leukocyte recruitment factors is low under quiescent conditions, but increased  
61 through both transcriptional and post-transcriptional mechanisms in response to circulating inflammatory  
62 cytokines. Not all areas of the vasculature are similarly affected however, as it is only regions exposed to  
63 LDF that exhibit elevated levels of adhesion molecules in response to NFκB agonists<sup>4</sup>.

64 While low and disturbed flow alone is insufficient to induce high levels of adhesion molecule  
65 expression, it does prime the endothelium for subsequent activation by cytokines. Endothelial cell priming  
66 in disturbed flow regions *in vivo* is demonstrated by response to systemic NFκB agonist lipopolysaccharide  
67 (LPS) with increased Vcam and E-selectin expression, while cells in regions with laminar flow do not<sup>4</sup>. *In*  
68 *vitro*, endothelial cells cultured under LDF or static conditions respond to NFκB agonist I11β by increasing  
69 surface Vcam expression, while cells cultured under laminar flow conditions do not<sup>5</sup>. Both chronic and  
70 acute changes in the endothelium contribute the priming of NFκB responses. In chronic conditions of LDF,  
71 subendothelial deposition of fibronectin changes the repertoire of integrin binding and increases NFκB  
72 responses<sup>6-8</sup>. However, the mechanisms responsible for priming following acute changes in flow are  
73 poorly understood and may contribute to atherosclerosis and other inflammatory responses.

74 Using an acute partial carotid ligation model of LDF, we observed alterations in post-transcriptional  
75 regulation by RNA splicing in primed endothelial cells<sup>9</sup>. Among the affected transcripts were multiple  
76 regulators of the NFκB signaling pathway, including canonical pathway genes such as IκBκγ (Nemo) and  
77 other known regulators, such as fibronectin<sup>9</sup>. Alternative splicing, which is coordinated by the spliceosome  
78 but directed by hundreds of RNA-binding proteins in the cell, allows a single gene and pre-mRNA to encode  
79 multiple unique mRNA molecules and protein products. Alterations in the levels and activities of RNA-  
80 binding splice factors can allow a cell to rapidly modify the composition of signaling pathways. For example,  
81 increased inclusion of alternative exons EIIIA and EIIIB in fibronectin is linked to alterations in extracellular  
82 matrix composition, integrin binding, and increased NFκB signaling<sup>7,10</sup>. Thus, we hypothesize that  
83 alternative splicing mediates acute endothelial priming during the arterial response to LDF. Here, we test  
84 this hypothesis by determining whether splice factors of the arterial endothelium activated in response to  
85 LDF are important in endothelial cell priming, identifying Ptpb1 as a potent mediator of priming and  
86 subsequent myeloid cell recruitment and atherogenesis.

87

## 88 Results

89

### 90 A CRISPR-KO screen of splice factors modulating alternative splicing in endothelial cells exposed to low 91 and disturbed flow reveals a requirement for Polypyrimidine tract-binding protein 1 (Ptpb1) in 92 endothelial cell priming.

93

94 To identify splice factors activated in endothelial cells in the earliest stages of priming, we examined  
95 splicing patterns in endothelial cells experimentally exposed to LDF for 48hrs through a partial carotid  
96 ligation (Figure 1A)<sup>9</sup>. In our earlier work, we had observed that many of the splicing changes in the  
97 endothelium were dependent on platelet recruitment. Platelets are an essential component of endothelial  
98 cell priming as regions of LDF do not recruit myeloid cells in the absence of platelets<sup>11-14</sup>. Additionally,

99  
100  
101  
102  
103  
104  
105  
106  
107  
108

activated platelets are sufficient to increase endothelial Icam and Vcam in static *in vitro* culture conditions that mimic the effects of LDF<sup>15</sup>. Thus, we focused on splicing changes induced in the endothelium upon platelet recruitment. Of the several thousand splicing changes we detected in the intima in priming (Figure 1B), we found that most were reverted by the depletion of platelets by anti-GPIB $\alpha$  (Figure 1C, D and E, and SI Figure 1). To determine which splice factors might be regulating platelet induced splicing changes under LDF, we assembled a list, based on (i) differential splice factor expression, (ii) enrichment of motifs nearby regulated core exons (CE), or (iii) splicing of the factor itself, which is often an indication of splice factor activity and autoregulation<sup>16</sup>. Based on these criteria, we deemed 57 splice factors likely to be important in the regulation of splicing changes in the endothelium under these conditions (Figure 2A).

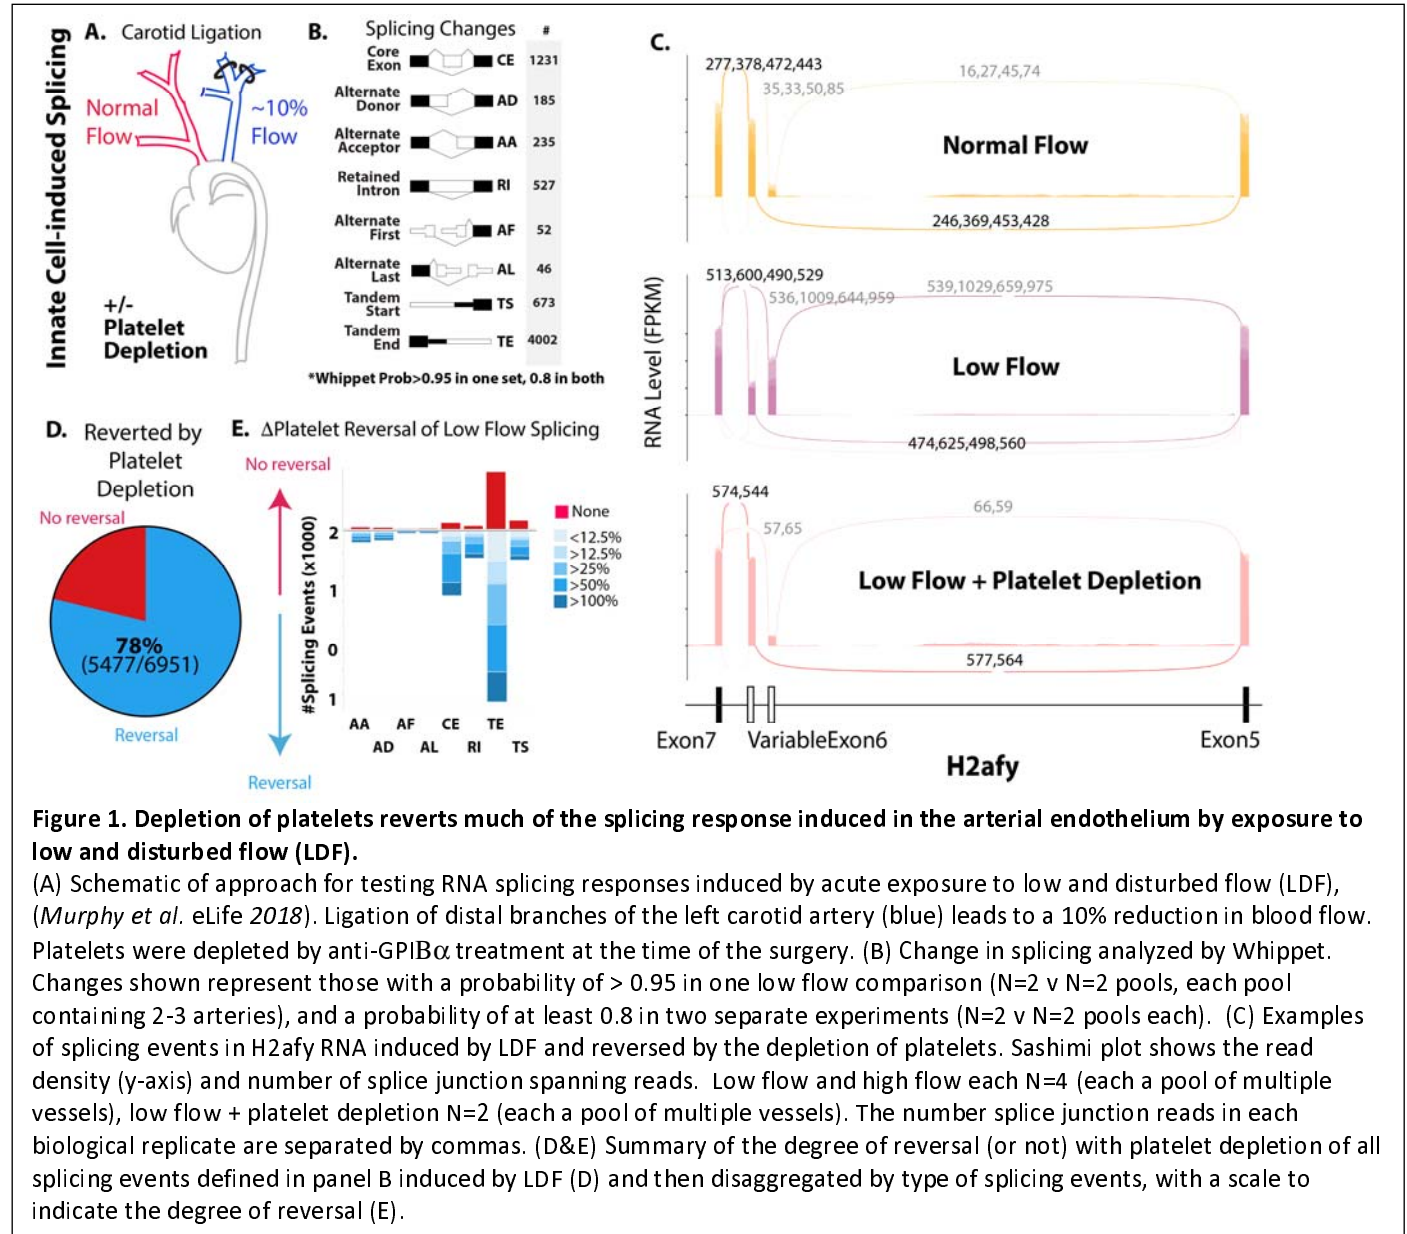

**Figure 1. Depletion of platelets reverts much of the splicing response induced in the arterial endothelium by exposure to low and disturbed flow (LDF).**

(A) Schematic of approach for testing RNA splicing responses induced by acute exposure to low and disturbed flow (LDF), (Murphy *et al.* eLife 2018). Ligation of distal branches of the left carotid artery (blue) leads to a 10% reduction in blood flow. Platelets were depleted by anti-GPIB $\alpha$  treatment at the time of the surgery. (B) Change in splicing analyzed by Whippet. Changes shown represent those with a probability of > 0.95 in one low flow comparison (N=2 v N=2 pools, each pool containing 2-3 arteries), and a probability of at least 0.8 in two separate experiments (N=2 v N=2 pools each). (C) Examples of splicing events in H2afy RNA induced by LDF and reversed by the depletion of platelets. Sashimi plot shows the read density (y-axis) and number of splice junction spanning reads. Low flow and high flow each N=4 (each a pool of multiple vessels), low flow + platelet depletion N=2 (each a pool of multiple vessels). The number splice junction reads in each biological replicate are separated by commas. (D&E) Summary of the degree of reversal (or not) with platelet depletion of all splicing events defined in panel B induced by LDF (D) and then disaggregated by type of splicing events, with a scale to indicate the degree of reversal (E).

109  
110  
111  
112

To assess contributions of these splice factors to endothelial cell priming, we established an *in vitro* CRISPR-KO screening approach which took advantage of our previous discovery that splicing patterns in cultured aortic endothelial cells resemble endothelial cells primed by LDF *in vivo* (Figure 2A & SI Figure 2&3). In our screen, we treated aortic endothelial cells with TNF $\alpha$ , and examined induction of Icam1 and Vcam. Guide

113 RNA (gRNA) targeting genes important in priming should be found more often in cells with low Icam1 &  
 114 Vcam responses than high responses, indicating that deletion of the targeted splice factors suppressed the  
 115 TNF $\alpha$ -response. Indeed, we could identify cells in our CRISPR pool that did not respond strongly to TNF $\alpha$   
 116 (Figure 2C). Importantly, we observed that this “low responder” phenotype was retained upon  
 117 restimulation, indicating their stable alteration by CRISPR editing (SI Figure 4). Using this approach, and  
 118 subsequent identification of enriched gRNA in low and high responders by 1) PCR amplification of lentiviral  
 119 insertions, 2) high-throughput sequencing and 3) statistical analysis, we found that Ptbp1 gRNA was  
 120 consistently enriched in cells with a reduced Icam1 & Vcam response to TNF $\alpha$  across multiple screens  
 121 (Figure 2D, and SI Table 1). We also observed that gRNA to Ptbp1 was enriched in low responders in our  
 122 iterative sorting experiment (low responders plated and sorted for low response a second time, (SI Table 1).

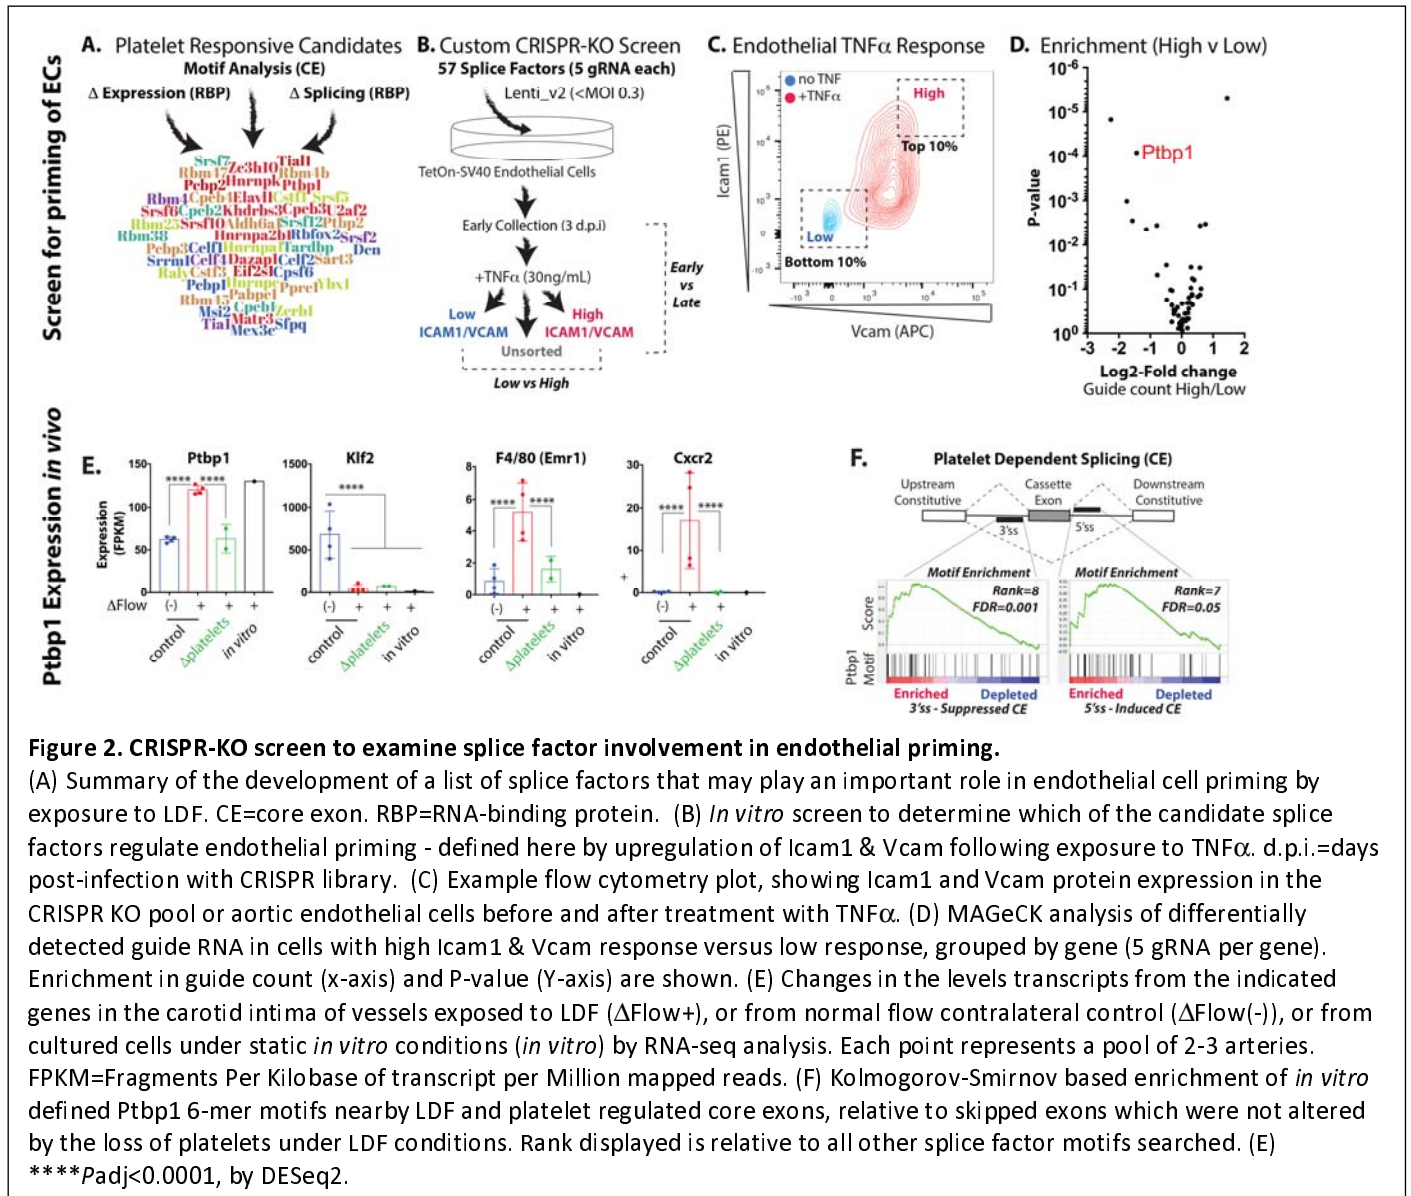

123  
 124 To determine whether impaired Icam1 & Vcam induction in cells containing Ptbp1 gRNA might be a result  
 125 of generally impaired cell function, we examined presence of Ptbp1 gRNA at early and late timepoints in  
 126 our pool of cells. Losses could represent reduced cell viability or proliferation, while gains could reveal  
 127 growth-suppressive splice factors as deletion of these genes would allow these cells to expand within the

128 pool over time. We found no significant loss or enrichment of Ptbp1-targeting gRNA, while we did observe  
129 reduced representation of other gRNA and increased representation of gRNA for Hnrnpa1, a splice factor  
130 that has been shown to inhibit cell proliferation in other contexts (SI Figure 5 and SI Table 2)<sup>17</sup>.

131  
132 We then reexamined the expression and motif analysis (Figure 2A) that had landed Ptbp1 on our short list  
133 of splice factors to be targeted, and observed that Ptbp1 expression is induced, in a platelet dependent  
134 manner, by exposure of the carotid endothelium to LDF (Figure 2E). There is a similar induction in  
135 endothelial cells in static conditions and in the presence of serum — as we would expect under these  
136 priming *in vitro* conditions (Figure 2E). Expression of Klf2, a transcription factor reduced in expression under  
137 LDF, was not affected by platelet depletion, while myeloid cell recruitment (indicated by macrophage  
138 marker F4/80 and neutrophil marker Cxcr2) was strongly impaired. These data support the hypothesis that  
139 platelets are not required for the initial low flow response of the endothelium (e.g. Klf2), but are required  
140 for full immune-activation. Finally, we found significant enrichment of Ptbp1 motifs at the 3' splice site side  
141 of core exons (CE) that were included less frequently under LDF conditions in a platelet dependent manner,  
142 consistent with the known role of increased Ptbp1 in suppressing exon inclusion from the 3' splice site  
143 (Figure 2F)<sup>18,19</sup>. We also found a weaker association of Ptbp1 motifs with the 5' splice site side of CE that  
144 were included more frequently under LDF in a platelet dependent manner (Figure 2F).

145  
146 Thus, informatics analysis and a targeted CRISPR-KO screen suggest that endothelial Ptbp1 expression,  
147 which is induced in a platelet dependent manner under LDF, contributes to the priming of endothelial cells.

### 148 **Endothelial Ptbp1 is required for NFκB-mediated transcriptional activation**

149  
150  
151 The dampening effect of Ptbp1 deletion on TNFα-induced expression of Icam1 and Vcam on the surface of  
152 endothelial cells could be mediated by several mechanisms, including a block in NFκB transcriptional  
153 activity or inhibition of Icam1 & Vcam translation or translocation to the plasma membrane. We had  
154 previously observed changes in splicing in key components of the NFκB signaling pathway in the response  
155 to LDF (e.g., IκBκγ, or Nemo)<sup>9</sup>, so we focused on NFκB transcriptional activation.

156  
157 To examine NFκB transcriptional activity, we modified a lentiviral NFκB reporter<sup>20</sup>, introducing eGFP as the  
158 reporter gene downstream of the NFκB binding motif (Figure 3A). Using this reporter, we again screened a  
159 CRISPR KO pool of aortic endothelial cells, with our targeted group of splice factors. Ptbp1 gRNA was  
160 enriched in cells with reduced NFκB activity to TNFα as determined by decreased GFP fluorescence (Figure  
161 3B), suggesting that deletion of Ptbp1 impairs TNFα-mediated NFκB transcriptional responses.

162  
163 CRISPR activity in pooled approaches leads to varying levels of deletion within the population, so to assess  
164 the effects of a verified Ptbp1 deletion, we generated independent CRISPR-KO endothelial cell clones, using  
165 two different Ptbp1 gRNA, as well as a set of non-targeting gRNA single cell clones (Figure 3C). To further  
166 confirm specificity, we rescued Ptbp1 expression in these Ptbp1 KO clonal lines by introducing a human  
167 PTBP1 cDNA construct (Figure 3C and data not shown). This is 97% identical to murine Ptbp1 at the amino  
168 acid level, but prevents CRISPR targeting of the construct due to the divergent nucleic sequence. We  
169 demonstrated Ptbp1 loss in the KO lines, and found that the human PTBP1 rescue restored Ptbp1  
170 expression (Figure 3D) and nuclear localization (Figure 3E).

171  
172 Using these Ptbp1 KO cell lines, we examined our NFκB transcriptional reporter and found that the NFκB  
173 response to TNFα was blocked by the loss of Ptbp1, and restored upon human PTBP1 rescue (Figure 3F  
174 with quantification in 3G). Multiple single-cell clones from different gRNA exhibited the same response,



175 further verifying these results (Figure 3H). Notably, as we had previously observed in our screens, loss of  
 176 Ptpb1 had little effect on endothelial cell survival or proliferation, as we found no significant differences in  
 177 proliferation among these different cell lines (SI Figure 5B).

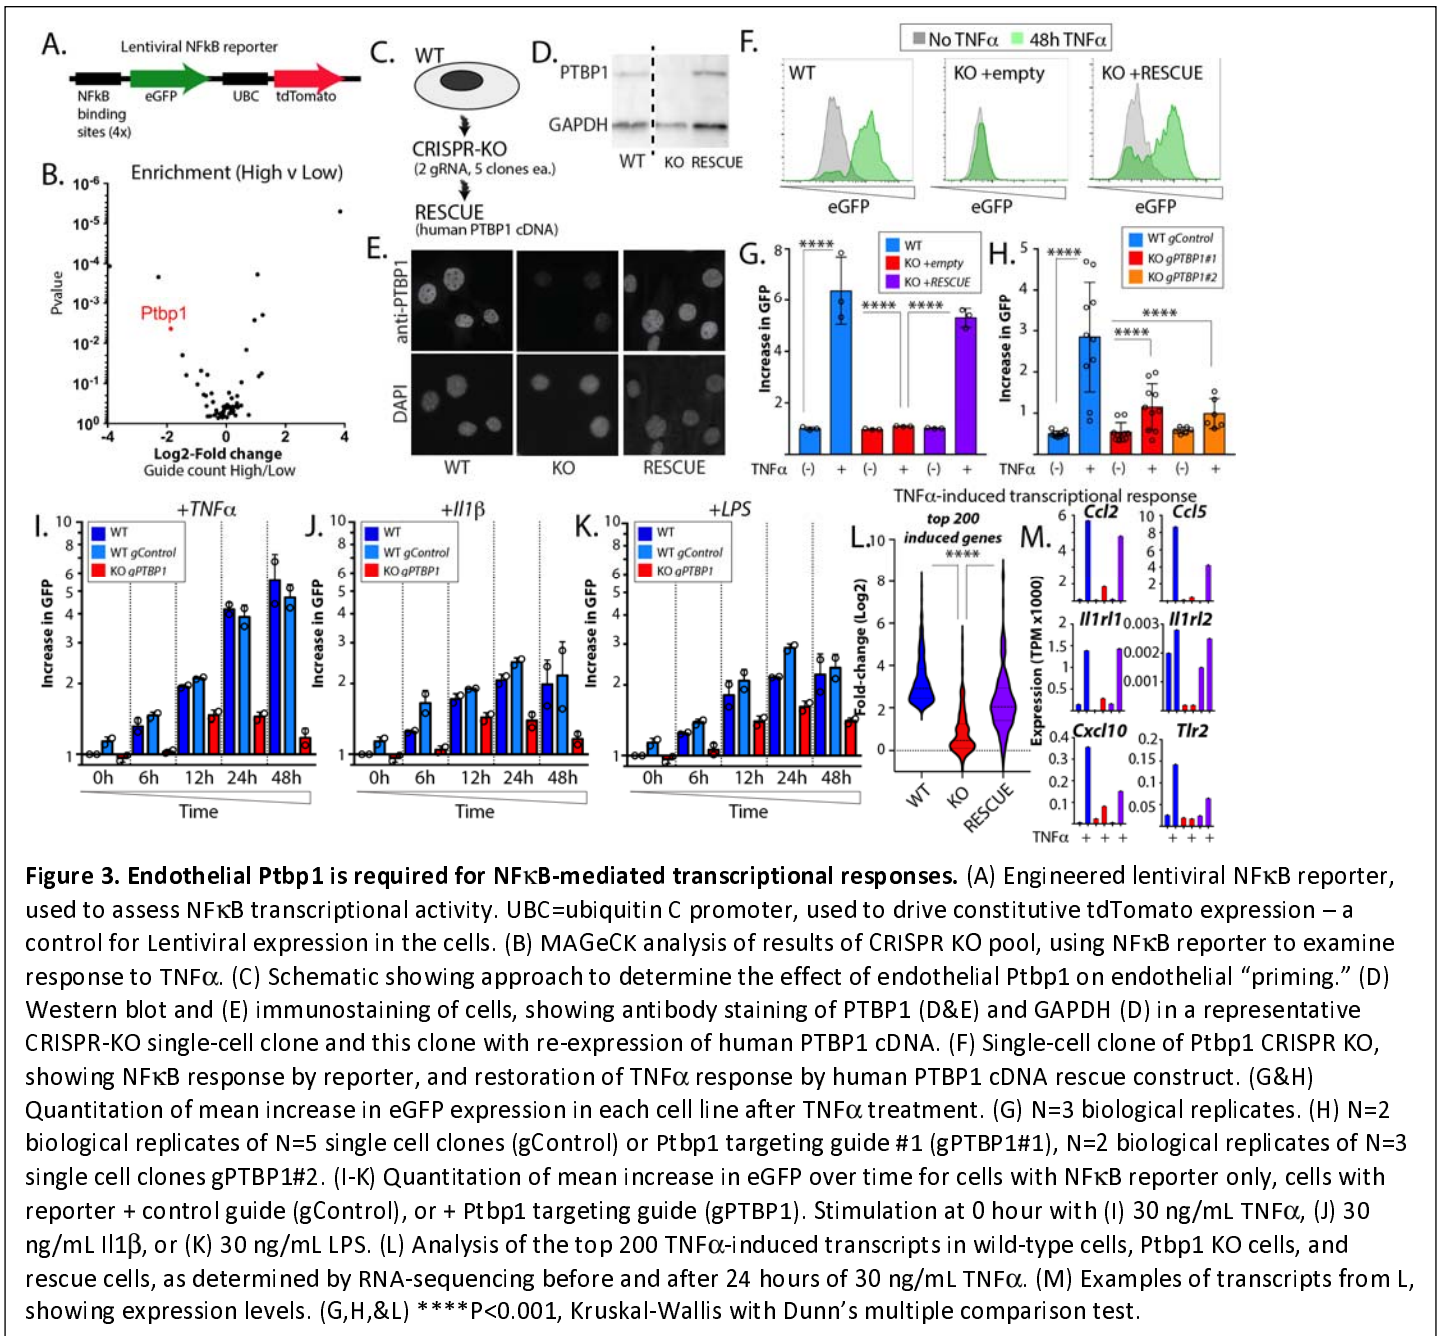

178  
 179  
 180  
 181  
 182  
 183  
 184  
 185

The NFκB signaling pathway is a common downstream mediator of many upstream inputs, including TNFα, Il1β, and LPS, each of which signal through different receptors at the plasma membrane. To understand whether Ptpb1-mediated NFκB inhibition was specific to TNFα, or whether it may act on the core pathway downstream of multiple inputs, we examined eGFP responses at multiple timepoints in CRISPR-KO cells and both wild-type or gRNA control cells. We found a similar inhibition of all signaling responses, beginning as early as 6 hours (Figure 3I-K), suggesting that loss of Ptpb1 inhibits core NFκB signaling.

186 As our work had focused on a single synthetic NF $\kappa$ B responsive element, we wondered if endogenous  
187 NF $\kappa$ B-mediated transcription was similarly affected. To examine this, we performed RNA-sequencing  
188 analysis on wildtype cells, our Ptbp1 CRISPR-KO cell line, and human PTBP1 rescue of these Ptbp1 CRISPR-  
189 KO cells, before and after treatment with TNF $\alpha$ . As expected, TNF $\alpha$  treatment led to large changes in  
190 transcription of canonical NF $\kappa$ B target genes. Analysis of the top 200 induced transcripts found in wild-type  
191 cells showed a nearly complete block in induction by TNF $\alpha$  in the Ptbp1 CRISPR-KO cells, and that this could  
192 be rescued, although not completely, in the human PTBP1 rescue cells (Figure 3L&M). The partial rescue  
193 could reflect differences in human and mouse Ptbp1, or that we restored only a single isoform of Ptbp1 – as  
194 we noted a second Ptbp1 band on Western blots that was not restored with human cDNA expression.  
195

196 Thus, Ptbp1 is critical for NF $\kappa$ B signaling responses in endothelial cells downstream of various inputs.  
197 Expression of Ptbp1 primes endothelial cell to respond to TNF $\alpha$ , I $\kappa$ B $\beta$ , and LPS, licensing them to express a  
198 wide range of genes involved in the regulation of inflammation and immunity.  
199

### 200 **Ptbp1 coordinates splicing in endothelial activation that modulates nuclear translocation of NF $\kappa$ B**

201

202 We reasoned that if Ptbp1 affects the core NF $\kappa$ B signaling pathway, it may alter expression or splicing of  
203 key components or modifiers of the pathway. To test this, we assessed levels of core NF $\kappa$ B signaling genes,  
204 using RNA-sequencing data from the different cell lines generated (Figure 4A). With the exception of Ripk1  
205 and Nfkbia, we found very little change in any of these genes at the whole transcript level, despite strong  
206 effects on canonical NF $\kappa$ B-induced genes. We then examined changes in RNA splicing. Consistent with the  
207 splice factor activity of Ptbp1, we observed many changes in alternative splicing, including some in coding  
208 regions of core NF $\kappa$ B pathway genes (e.g., I $\kappa$ B $\kappa$  $\gamma$ /NEMO & Ubc), and key regulators of the NF $\kappa$ B signaling  
209 pathway (e.g., Pidd1, Stat3, Irak4, and Pdlim7) (Figure 4B&C and SI Table 4). In total, there were 110  
210 splicing changes in the Kegg NF $\kappa$ B pathway genes, 54 with a splicing difference of >10% and 38 with a  
211 splicing difference >20% (SI Table 4). In these datasets, splicing levels at a particular junction are indicated  
212 by the percent spliced in (Psi), where a Psi of 0.1=10% spliced and 0.9=90% spliced in. Notably, large  
213 changes in RNA splicing often occurred in the absence of changes in total RNA expression, as was the case  
214 for I $\kappa$ B $\kappa$  $\gamma$  (Figure 4B&D). For other genes, like Pdlim7, changes in splicing were correlated, though generally  
215 larger than the changes in transcript levels.  
216

217 To determine whether Ptbp1 affected splicing of genes in the platelet-mediated endothelial activation we  
218 previously observed (Figure 1), we examined the overlap between platelet regulated transcripts *in vitro* and  
219 this *in vivo* dataset, limiting to splicing events with at least 5 reads of support in both sets. We found  
220 evidence for Ptbp1 regulation of ~25% of all the platelet-regulated splicing events (Figure 4E). Analysis of  
221 these splicing events revealed that those with reduced inclusion upon platelet depletion also showed  
222 reduced inclusion upon Ptbp1 depletion (Figure 4F), and vice versa, consistent with our hypothesis that  
223 Ptbp1 activity is increased in endothelial cells under LDF in a platelet dependent manner.  
224

225 To determine whether Ptbp1 loss affected localization or activity of NF $\kappa$ B components, we examined the  
226 expression of key proteins in the pathway, including IKK $\alpha$ , IKK $\beta$ , I $\kappa$ B $\kappa$  $\gamma$ (NEMO), IK $\beta$  $\alpha$  and its  
227 phosphorylation, and nuclear translocation of NF $\kappa$ B. Although levels of IKK $\alpha$ , IKK $\beta$ , I $\kappa$ B $\kappa$  $\gamma$ , and IK $\beta$  $\alpha$  were  
228 similar (SI Figure 6), we observed reduced TNF $\alpha$ -mediated nuclear translocation of NF $\kappa$ B in Ptbp1 KO cells,  
229 which was rescued by restoration of Ptbp1 (Figure 4G-J).  
230



231 Thus, loss of Ptbp1 altered splicing in several genes in the core NFκB signaling pathway (e.g. IκBκγ), or in  
 232 important modifier pathways (e.g., Pdlim7), and lead to a loss of NFκB nuclear translocation following TNFα  
 233 treatment.  
 234

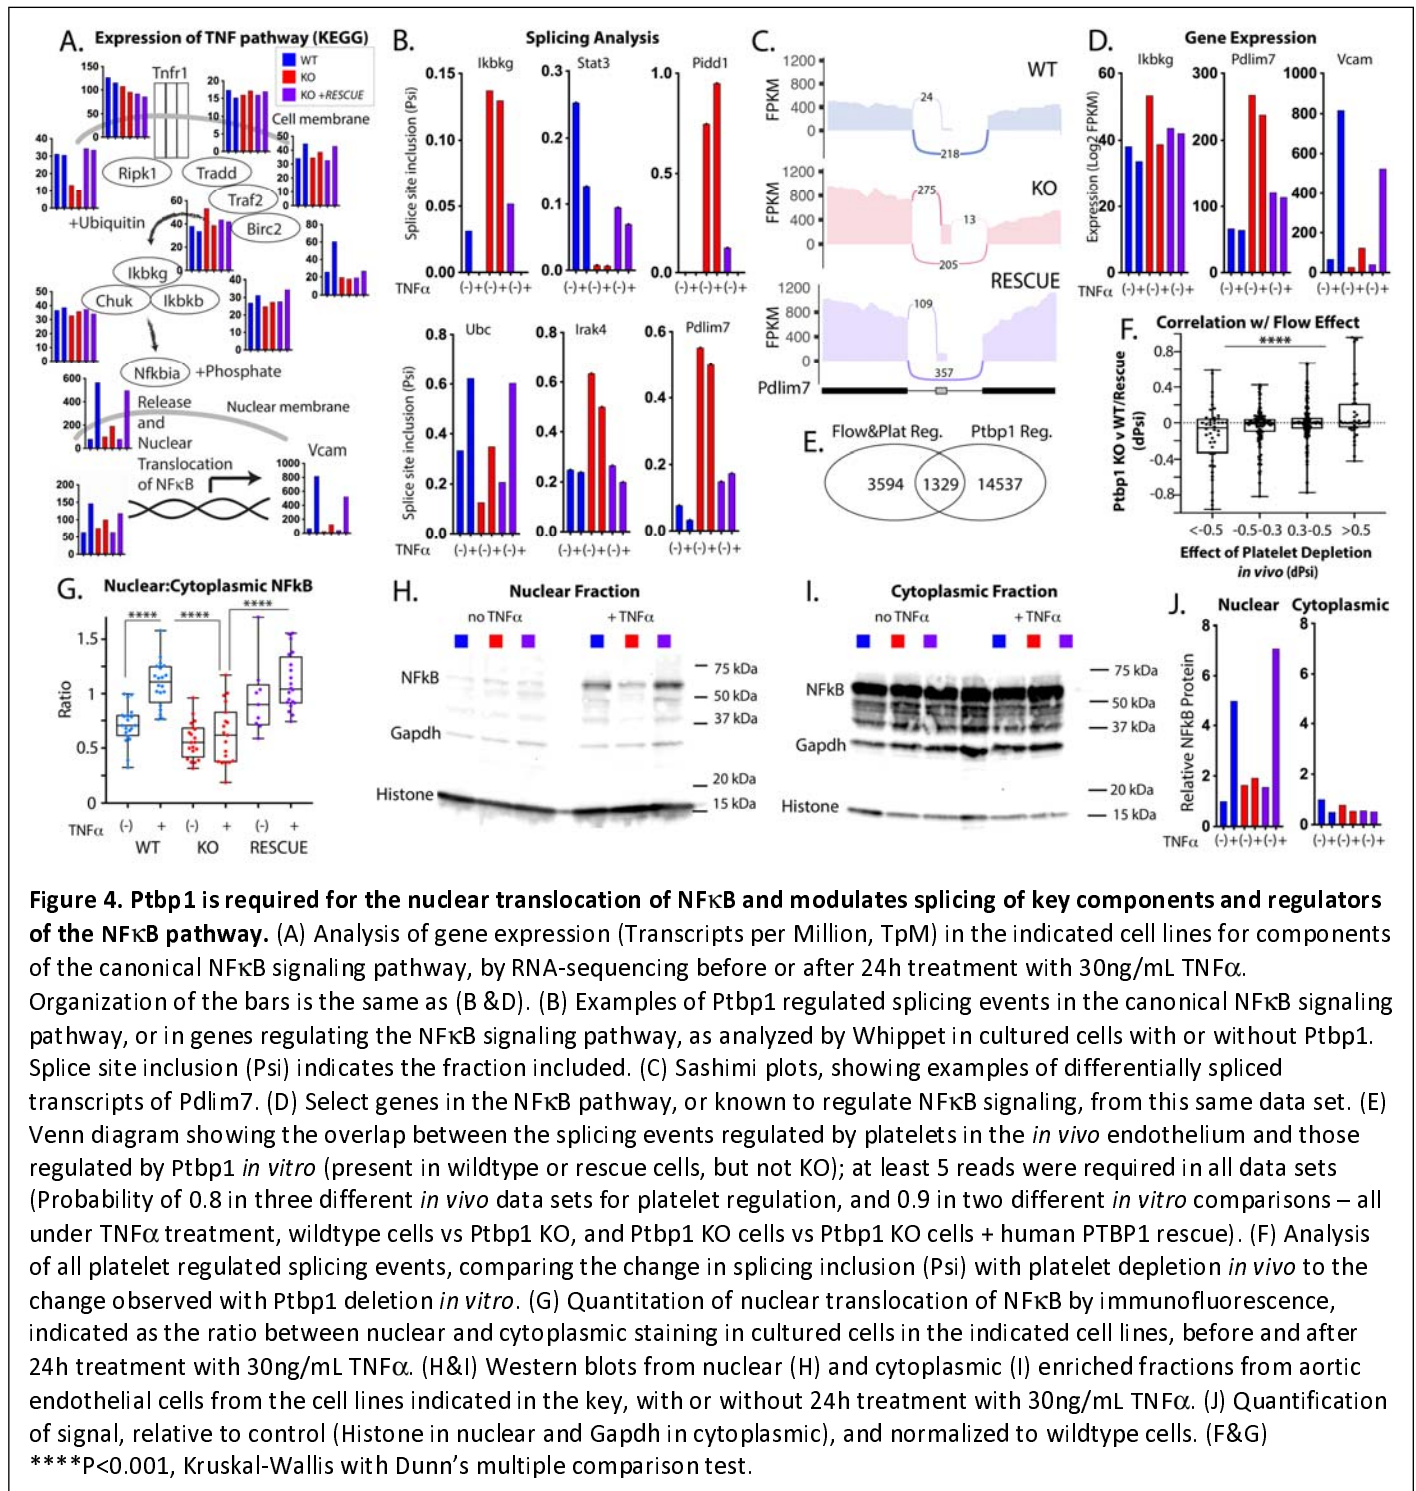

235 **Endothelial Ptbp1 deletion reduces myeloid cells in atherosclerotic plaque**

236  
 237 To test the *in vivo* requirement for Ptbp1 in endothelial cell priming in the context of atherosclerosis, we  
 238 generated a conditional endothelial specific Ptbp1 mouse (*Cdh5(PAC)CreERT2; Ptbp1<sup>ff</sup>* or EC-KO), by

239 intercrossing mice with these alleles<sup>21,22</sup>. We induced Ptbp1 excision in 6 to 7 week-old mice by tamoxifen  
 240 treatment. We induced hypercholesterolemia by treating Ptbp1 EC-KO mice or their littermate controls with  
 241 AAV-PCSK9 and a high fat diet<sup>23</sup>. After 3 months of this diet, we collected aortic arches, innominate  
 242 arteries and blood samples for immune cell analysis and plaque composition. The inner curvature of the  
 243 aortic arch and the innominate arteries are regions exposed to LDF, where endothelial cells are primed and  
 244 plaque develops<sup>4</sup>. We found that, while both Ptbp1 EC-KO mice and their littermate controls exhibited a

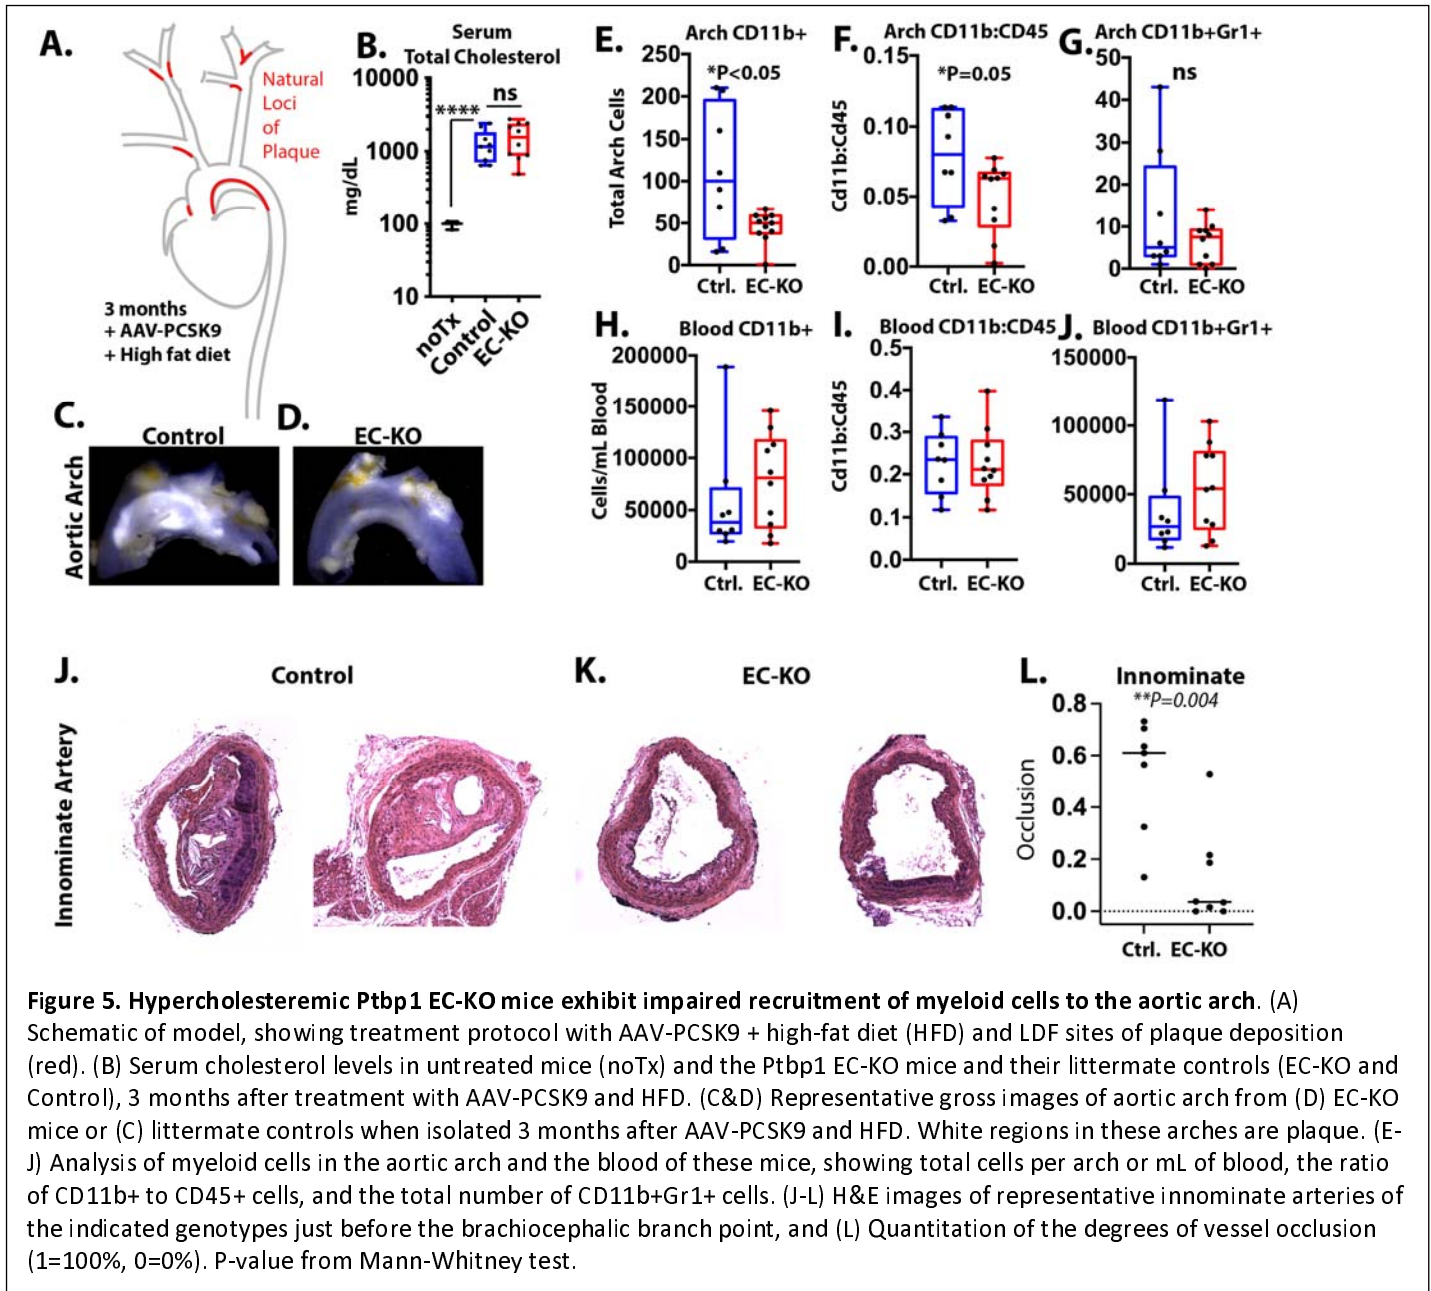

245 robust increase in cholesterol levels (~10-fold standard chow diet mice; Figure 5B) and developed  
 246 atherosclerotic plaque in the aortic arch, that plaque was visibly reduced in the arches of EC-KO mice  
 247 (Figure 5C&D). Consistent with an impaired inflammatory priming of the endothelium, there were also  
 248 fewer CD11b+ cells found in these plaques (Figure 5E), and the ratio of CD11b+ cells to CD45+ cells was  
 249 reduced in the plaque (Figure 5F). We observed a similar trend in CD11b+Gr1+ cells (Figure 5G), although  
 250 the proportion of CD11b+ cells that were also Gr1+ was very low (~10%). This did not appear to result from

a systemic reduction in the number of circulating CD11b+ cells, either in total, or as a percentage of CD45+ cells, as these were not reduced in Ptbp1 EC-KO mice (Figure 5H-J).

Therefore, Ptbp1 deletion from the endothelium impairs myeloid cell accumulation in atherosclerotic plaque in regions of endothelial cell priming, consistent with the reduced levels of priming we observed in cultured cells.

### Ptbp1 expression positively associates with plaque burden and TNF/NFκB signaling pathway in human arteries

We reasoned, if Ptbp1 is required for efficient TNFα/NFκB signaling responses and myeloid cell recruitment to plaque, that we might find these correlations in human tissues. To test this, we examined the GTEx database, which contains RNA transcript analysis and pathology reports from hundreds of donor arteries (Figure 6A). While this database is focused on non-diseased tissues, nearly all arteries in the donor group

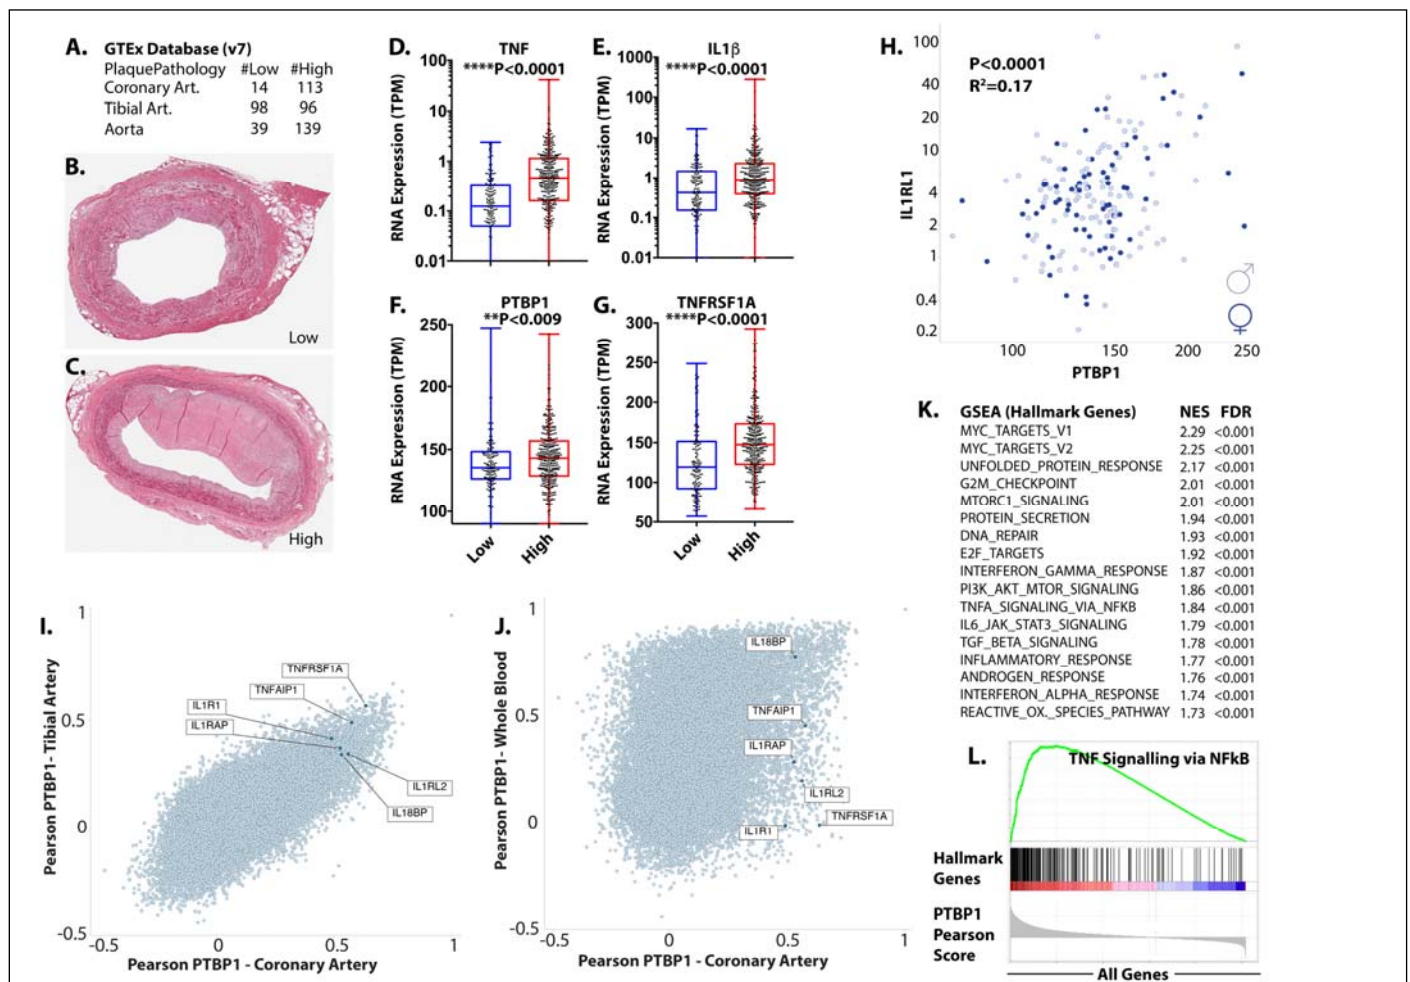

**Figure 6. Ptbp1 expression correlates with plaque and expression of TNF pathway genes in human arteries.** (A) Summary of arteries (Art.) of each type with indicated pathology data from the GTEx database (v7). (B&C) Examples of histological sections used for analysis of plaque characteristics in the GTEx database, showing examples of low (B) and high (C) plaque. (D-G) Analysis of expression of the indicated genes in arteries separated by low and high plaque phenotype. (H) Gene-gene correlation between the expression of PTBP1 and TNFRSF1A in human coronary arteries, where sex is indicated by different shading (gray=female; male=black). (I&J) Pearson correlation scoring for each gene-gene interaction in coronary and tibial arteries (I) or coronary arteries and blood (J), showing whether these gene-gene interactions are conserved between tissues. (K) Top GSEA Hallmark Gene Groups for genes most associated with Ptbp1 (highest Pearson scores). NES=normalized enrichment score, FDR=false-discovery rate (L) Example GSEA plot, showing the location of TNF Signaling via NFκB Hallmark Genes among those most associated with PTBP1 expression (left side of the Pearson Score plot). (D-G) Mann-Whitney test.

265 collected include some degree of plaque formation, reflecting the ubiquitous nature of this process in  
266 human arteries with age. Nevertheless, a small subset of arteries was deemed free, or mostly free of  
267 plaque by pathology report (Figure 6B), while others had increasing levels of plaque (Figure 6C). As  
268 expected, expression of TNF $\alpha$  and Il1 $\beta$ , cytokines central to plaque development and immune cell  
269 composition, were enriched in arteries with plaque versus those without (Figure 6D&E). Ptbp1 and the TNF  
270 receptor were also increased in arteries with plaque versus those without (Figure 6F&G). Notably, there is a  
271 wide range of expression of both cytokines and their receptors in plaque, reflecting widely varied immune  
272 milieus within plaque (Figure 6D-G). This variation is important, as immune cell composition in plaque is  
273 strongly correlated with myocardial infarction and stroke. Therefore, we asked what pathways are most  
274 associated with Ptbp1 in coronary arteries by examining gene-gene correlations with Ptbp1 expression (e.g.  
275 TNFRSF1A, Figure 6H). Doing this for all genes in specific arteries (e.g. coronary, tibial, aorta) revealed a  
276 strong conservation of gene-gene interactions between arteries (Figure 6I), but that genes correlated with  
277 Ptbp1 in arteries did not have the same correlation in whole blood (Figure 6J). We then asked what gene  
278 groups are most often positively correlated with Ptbp1 expression, and found a strong signature for Myc  
279 (which can induce Ptbp1 expression, and is also regulated by Ptbp1<sup>24-26</sup>), but also Interferon gamma  
280 signaling, and TNF signaling via NF $\kappa$ B (Figure 6K&L and SI Table ).

281  
282 Thus, in human arteries, Ptbp1 expression is positively associated with plaque accumulation and with  
283 inflammatory pathways (TNF signaling via NF $\kappa$ B), that are also regulated by Ptbp1 in mice.

## 284 285 **Conclusions**

286  
287 Here, through a focused CRISPR-KO screen of splice factors involved in the early endothelial response to  
288 LDF, we found that Ptbp1 is required for efficient NF $\kappa$ B signaling responses in arterial endothelial cells.  
289 Absence of Ptbp1 limits NF $\kappa$ B transcriptional responses to pro-inflammatory cytokines by reducing nuclear  
290 translocation of NF $\kappa$ B, effects which are rescued by human PTBP1. As Ptbp1 expression and downstream  
291 splicing responses are induced in the arterial endothelium in the early inflammatory response to LDF, we  
292 propose that activation of Ptbp1 may be an important step in the priming of endothelial cells, licensing  
293 them for the induction of cell adhesion molecules Icam and Vcam upon cytokine stimulation. Consistent  
294 with this idea, Ptbp1 is positively correlated with human plaque burden and TNF $\alpha$ -mediated signaling  
295 pathways in human coronary arteries. Furthermore, deletion of Ptbp1 from the endothelium limits myeloid  
296 cell recruitment to sites of natural LDF and endothelial priming.

## 297 298 **Contextual role of Ptbp1 in priming acute and chronic inflammatory responses**

299  
300 In this work, we have used a simplified *in vitro* model to understand the role of RNA-binding protein  
301 expression on endothelial cell priming, and to show that this process depends on platelet recruitment. We  
302 have previously shown that endothelial cells cultured *in vitro* under serum and static conditions exhibit an  
303 expression and splicing profile that mimics activated carotid endothelium *in vivo*, after exposure to partial  
304 carotid ligation<sup>9</sup>. This is an expected result, as typical *in vitro* culture conditions expose endothelial cells to  
305 platelet and immune releasate in serum, and a lack of flow that removes quiescence signals from laminar  
306 flow. Indeed, cultured endothelial cells *in vitro* are primed for the expression of Icam1 and Vcam in  
307 response to TNF $\alpha$  or Il1 $\beta$  stimulation<sup>5</sup>. Expression of Ptbp1 is elevated *in vitro*, as it is *in vivo* in endothelial  
308 cells activated by exposure of LDF. Notably, the expression of Ptbp1 *in vivo* is not altered by flow alone, as it  
309 did not change under LDF conditions when platelets were removed. Similarly, although basal levels of  
310 Ptbp1 in culture were higher than *in vivo*, these levels were further increased by the addition of platelets  
311 and monocytes (SI Figure 7), but neither plasma nor platelets and monocytes alone. Thus, our model is that



312 platelets are recruited to endothelial cells exposed to LDF *in vivo*, where they interact with the endothelium  
313 through an unknown mechanism to induce endothelial cell priming – mediated in part by an increase in  
314 Ptbp1 expression. This leads to an elevated response to pro-inflammatory cytokines, such as TNF $\alpha$  or IL1 $\beta$ ,  
315 and increased recruitment of myeloid cells to the endothelium.

316 Our model is consistent with the observation that not all endothelial cells in LDF regions of aorta  
317 exhibit Vcam expression upon systemic LPS treatment<sup>4</sup>. We propose that the differential response among  
318 cells may be due to local recruitment of platelets and activation of the priming response we describe here,  
319 through increased expression of Ptbp1. Consistent with this idea, platelets are critical for the recruitment of  
320 myeloid cells to regions of the vasculature exposed to LDF, and also for the development of atherosclerotic  
321 plaque<sup>11-14</sup>. While some of these effects are due to mechanisms previously described, such as deposition  
322 of CCL5 on the endothelial cell surface by activated platelets, and the tethering of myeloid cells to the  
323 endothelium by P-selectin expression on platelet intermediates<sup>14</sup>, we propose that induction of Ptbp1 in  
324 the endothelium is an important consequence of platelet recruitment and contributes to the progression of  
325 vascular inflammation and plaque development.

### 327 **Ptbp1 and the NF $\kappa$ B signaling pathway**

328  
329 Polypyrimidine tract binding protein (Ptbp1, or hnRNP I) is widely expressed, and has been shown to  
330 regulate splicing responses and differentiation in a wide range of tissues, including neurons,  
331 cardiomyocytes and leukocytes. While this work is the first that we know of to show a direct effect on the  
332 NF $\kappa$ B signaling pathway, prior reports suggest that Ptbp1 effects on inflammatory responses are not limited  
333 to the endothelium. Ptbp1 was identified in an RNA interference (RNAi) screen to identify regulators of the  
334 senescence-associated secretory phenotype (SASP) in cancer cells, indicated by expression of IL-6 and IL-8  
335<sup>27</sup>. NF $\kappa$ B signaling activation is critical in the induction of the SASP response, and small interfering RNA  
336 (siRNA) to NF $\kappa$ B subunit RELA suppressed the response as well. Interestingly, knockdown of Ptbp1 had little  
337 effect on the growth of cells in this screen, as we observed in human arterial endothelial cells here.  
338 However, in contrast to our results in endothelial cells, knockdown of Ptbp1 in cancer cells did not interfere  
339 with TNF-mediated induction of an NF $\kappa$ B reporter<sup>27</sup>. In another study, knockdown of Ptbp1 in T cells led to  
340 increased T cell expansion, which coincided with increased level of IK $\beta$  $\alpha$ . While nuclear NF $\kappa$ B was not  
341 measured, the prediction would be that increased IK $\beta$  $\alpha$  could lead to increased cytoplasmic sequestration  
342 of NF $\kappa$ B<sup>28</sup>. The consistent theme is not the mechanism, as there was little difference in IK $\beta$  $\alpha$  with or  
343 without Ptbp1 in arterial endothelial cells, but that the pathway is consistently affected by Ptbp1.

344 The specific mediators of the effect of Ptbp1 on the NF $\kappa$ B signaling pathway are not yet clear, but  
345 alterations in RNA splicing are a likely cause. RNA-binding proteins can have diverse cellular functions,  
346 including RNA transport, stability, and translation, but given the predominantly nuclear localization of the  
347 splice factor in these cells, altered nuclear splicing functions is the most likely possibility. Consistent with  
348 this idea, there is a substantial overlap between RNA splicing events regulated *in vivo* by the loss of  
349 platelets and those regulated *in vitro* by the loss of Ptbp1. Some notable examples include an altered 3'UTR  
350 in IK $\beta$  $\gamma$  (Nemo), a core NF $\kappa$ B signaling pathway component, a skipped exon in Pdim7, an ubiquitin ligase  
351 of p65 which limits NF $\kappa$ B signaling<sup>29</sup>, and several genes linked to autoimmune or inflammatory diseases in  
352 human genetic association studies, such as STAT3 (Crohn's disease, multiple sclerosis, and psoriasis)<sup>30</sup>,  
353 FNBP1 (Crohn's disease, multiple sclerosis, psoriasis, Type I diabetes)<sup>31</sup> and MAGI1 (Crohn's disease,  
354 psoriasis and Type-1 diabetes)<sup>32</sup>. In total, we detected splicing alterations in about half of the Kegg NF $\kappa$ B  
355 genes in our Ptbp1 KO cells, and many more splicing events peripherally related to the pathway. It is likely  
356 that the reduced NF $\kappa$ B signaling response we observed in cells is a result of more than one of these  
357 alterations, but a future broad analysis of the regulated splicing events will be required to understand their  
358 relative contributions.

359

## 360 **Ptbp1 in the context of atherosclerosis and human cardiovascular disease**

361

362 Two major risk factors for atherosclerosis are also linked to increased Ptbp1 expression: senescence  
363 and integrin-mediated adhesions to fibronectin. Increased Ptbp1 expression has been observed with age  
364 and in senescent cells<sup>27,33</sup>. Aging is arguably the single greatest risk factor for atherosclerosis. Increasing  
365 numbers of senescent cells in the arterial intima appear to be an important contributor<sup>34</sup>. Senescent  
366 endothelial cells express the potent proinflammatory cytokine IL6 as a result of increased NFκB activity<sup>35</sup>,  
367 and markers of senescence are more abundant in patients with endothelial dysfunction<sup>36</sup>. Ptbp1  
368 localization is also dynamically altered by cell adhesion to fibronectin matrix<sup>37</sup>, being mainly in the  
369 cytoplasm during adhesion and until the cell has established focal adhesions – at which point its nuclear  
370 localization is restored. In mouse embryonic fibroblasts, Ptbp1 was bound to mRNA encoding vinculin and  
371 alpha-actinin – bringing them to the spreading periphery, and was required for cell spreading<sup>37</sup>. In  
372 response to LDF patterns and in early atherogenesis, fibronectin is deposited beneath the endothelium of  
373 arteries<sup>6,10,38</sup>. Fibronectin that is deposited, either from the plasma or the endothelium, promotes NFκB  
374 activity and myeloid recruitment and plaque in these regions<sup>6,39</sup>. As these responses are determined by the  
375 specific matrix binding integrins<sup>6,40</sup>, it may be interesting to examine Ptbp1 localization and activity upon  
376 binding of cells to other matrices than fibronectin.

377 Our evidence from cells and the animal model indicates a causal role for Ptbp1 in endothelial  
378 activation and plaque development. While there have been no focused studies on Ptbp1 function in human  
379 atherosclerosis or inflammatory diseases, we note that a SNP in Ptbp1 is correlated with C-reactive protein  
380 (CRP) levels, a marker of systemic inflammatory responses (rs123698-G, P=1e-9)<sup>41</sup>. As Ptbp1 levels in  
381 human arteries correlated with more severe plaque, and perhaps more importantly, with RNA markers of  
382 TNFα-NFκB signaling pathway activity in those plaques, understanding the links between innate immune  
383 cell recruitment, senescence, and matrix adhesion, and Ptbp1 activity may provide new insights and  
384 approaches to understanding inflammatory risk in atherosclerosis and other inflammatory diseases.

385

386 In conclusion, we report that Ptbp1 – with increased in expression in regions of the vasculature exposed to  
387 low and disturbed flow – is required for NFκB nuclear localization upon stimulation. As loss of Ptbp1 reverts  
388 alternative splicing patterns in cultured and activated endothelial cells towards a quiescent endothelium,  
389 and blunts the subsequent response to cytokine stimulations by TNFα and Il1β, we propose that Ptbp1 is a  
390 critical component of endothelial cell priming. We predict that this Ptbp1 function will be conserved across  
391 different vascular beds and inflammatory responses. Therefore, further investigation of this mechanism  
392 leading to increased expression and activity of Ptbp1, its associated RNA-binding splice factors, and the RNA  
393 transcripts they regulate is warranted.

394

## 395 **Materials & Methods**

396

### 397 **CRISPR-KO Screening and Single Cell Clones**

398 *Generation and amplification of CRISPR plasmid pools.* (Splice factor pool) Five CRISPR-KO guide sequences  
399 were designed to each of 57 splice factor targets using described rules (Azimuth 2.0)<sup>42</sup>. Oligos were  
400 ordered and BsmBI batch-cloned into the gRNA expression core of a LentiCRISPR\_v2 plasmid containing  
401 Cas9 (Addgene 52961). The library was amplified in Stbl3 (Thermo) and tested by miSeq analysis for  
402 coverage and skew. Individual guides (e.g. to Rbfox2) followed the same protocol, but were confirmed by  
403 Sanger sequencing. (Genome-wide pool) For the genome-wide screen, the Brie library in LentiCRISPR\_v2  
404 (Addgene 73632) was obtained as a plasmid library and amplified in Stbl4 (Thermo) on 500cm<sup>2</sup> LB-agar  
405 coated ampicillin+ selection plates. The library was tested by NextSeq analysis for coverage and skew.



406 *Transduction of Splice Factor pool and Genome-Wide CRISPR pool into mouse aortic endothelial cells*  
407 (*mAEC*). Lentivirus was generated in 293T cells using delta 8.9 and pHCMV-EcoEnv (Addgene 15802) as  
408 packaging plasmids and 25kDa linear PEI as a transfection agent. Media was changed at 1 day and  
409 supernatant was taken at 3 days after transfection for the treatment of recipient cells at MOI <0.3 (>1000  
410 infected cells per guide). Virus supernatant was added to recipient mAECs with polybrene (8ug/mL), and  
411 cells were selected with puromycin for 4 days, confirming a MOI<0.3 and complete killing of uninfected  
412 cells. In experiments examining induction of Icam and Vcam in the endothelium and protein and RNA  
413 analysis, recipient cells were TetOn-Sv40 aortic endothelial cells, prepared as previously described<sup>9,10</sup>. In  
414 experiments in which eGFP reported NFkB signaling activity, recipient cells had been infected with a  
415 modified version of an NFkB reporter construct, engineered to express RFP constitutively and eGFP upon  
416 activation of the 4x NFkB binding motif. An aliquot of cells was taken 3-4 days post infection for an early  
417 timepoint analysis of lentiviral library representation.

418 *Assessing effects on inflammatory response.* mAECs harboring CRISPR guides were trypsinized and split into  
419 low glucose DMEM and 10% FBS into new dishes, without doxycycline to stop growth. 24 hours later, cells  
420 were once again trypsinized and collected for staining and flow cytometry.

421  
422 **Enrichment of guides in cells with increased or decreased Icam1/Vcam or NFkB reporter.** DNA was  
423 collected from sorted subsets of cells Quick DNA kit (Zymo). Lentiviral insertions in genomic DNA were  
424 amplified by nested PCR, using PCR1 primers (see table) followed by PCR2 primers containing barcodes and  
425 Illumina priming sequences (see table). PCR reactions were separated using a 2% agarose gel, and bands of  
426 interest were excised. PCR products were column cleaned (Gel cleanup kit, Zymo), and pooled based on  
427 relative concentration. Pooled samples were sequenced on Illumina NextSeq instrument using 75bp single  
428 end (SE) reads.

429  
430 **Identification of top Icam1/Vcam or NFkB regulators (Bioinformatics approach).** Fastq files were analyzed  
431 using Mageck-0.5.6 software, providing counts of each guide in each sequenced population, and  
432 differences in their representation (mageck test).

433  
434 **Expression of human PTBP1 cDNA in cells**  
435 Poly(A) primed cDNA was prepared from human aortic endothelial cells. PCR primers with restriction sites  
436 were used to amplify the expected band size for Ptbp1, and this was ligated into pLV-EF1a-IRES-Blast  
437 (Addgene Plasmid #85133) using EcoR1 and BamHI restriction sites. The sequence of the inserted cDNA was  
438 confirmed by Sanger sequencing. In the described experiments, both a “empty” rescue construct and the  
439 Ptbp1 containing construct were used.

#### 440 441 **Immunofluorescence and Quantification**

442 mAEC (TetOn-SV40, hTert immortalized) were plated onto collagen-coated coverslips in a 6 well cell culture  
443 plate without the presence of doxycycline (to stop growth), but with low glucose DMEM + 10% FBS. 24  
444 hours after plating, DMEM + FBS was removed, and coverslips were washed in the cell culture plates with  
445 cold PBS (3x). Cells were fixed with cold 4% paraformaldehyde (PFA) for 5 minutes on ice. Coverslips were  
446 washed again 3x with cold PBS. For Ptbp1 staining, cells on coverslips were permeabilized for 10 minutes at  
447 room temperature with 0.1% Triton-x in PBS. All other immunofluorescence experiments did not  
448 permeabilize before staining with primary antibody. Blocking buffer for Ptbp1 staining was 1% BSA, 0.3M  
449 glycine in PBS + 0.1% Tween for 1 hour at room temperature. All other staining used 10% normal goat  
450 serum (NGS) + 0.1% Tween in PBS. Ptbp1 staining was performed for 2 hours at 1:500 (Abcam, ab133734)  
451 and NFkB (Cell Signaling, 8242) staining for 2 hours at 1:100 at room temperature. Secondary staining was

452 done for 1 hour at room temperature using a fluorescently-conjugated antibody. Images were taken on a  
453 Zeiss epifluorescent microscope using ZenPro software. Quantification was performed using ImageJ (1.50i).

#### 454 **Western Blot and Quantitation**

456 2x Laemmli buffer was added to the adherent cells and 2uL of phosphatase inhibitor cocktail 2 (Sigma,  
457 P5726) and 2uL of phosphatase inhibitor cocktail 3 (Sigma, P0044) were added to the cell culture plates for  
458 5 minutes before cell lysate was scraped into 1.5mL Eppendorf tubes. 1uL of Benzonase (Sigma, E1014) was  
459 added to each sample and lysates were placed on ice for 5 minutes before being sheared 5 times with a 26  
460 gauge needle. 5% of total volume was then placed in a separate Eppendorf tube, and freshly prepared 1M  
461 DTT (dithiothreitol, 1uL/5uL cell lysate, Sigma D9779) was added. Samples were then placed at 95°C for 5-  
462 10 minutes before being loaded onto the western blot gel. Gels were run at 125v for 1.5 hours before  
463 western blot transfer was set up to run overnight at 4°C (100v for 1 hour, then O/N at 30v). Blocking was  
464 done using 5% milk in TBST. Primary antibody staining (dilution is antibody dependent, but followed  
465 manufacturer's recommendation) was done for 2 hours at room temperature, secondary staining (1:5,000)  
466 was done for 1 hour at room temperature, and GAPDH staining (1:10,000) was done for 2 hours at room  
467 temperature, all with rotation. Blots were imaged using Clarity ECL Western Blot substrate (Biorad,  
468 1705060). Quantitation was performed using ImageJ (1.50i) by inverting the Western Blot image and  
469 subtracting the background intensity from the GAPDH and the band of interest intensity.

#### 470 **Nuclear Fractionation**

472 Adherent cells were trypsinized and pelleted. Cell counts were performed prior to any further  
473 experimentation. Each cell pellet was resuspended in 100uL of Nuclei EZ Prep Isolation buffer (Sigma,  
474 NUC101) and placed on ice for 5 minutes before being centrifuged (5 minutes at 500 x G). Supernatant  
475 (cytoplasmic fraction) was collected, and to nuclei fraction, another 500uL of EZ Prep Isolation buffer was  
476 added (resuspending the cell pellet in the buffer) and placed on ice for 5 minutes before 500uL of Isolation  
477 buffer was added (for 1 mL total volume). Cells were pelleted by centrifugation, supernatant was removed,  
478 and pellet was resuspended in 100uL of EZ Prep Isolation buffer before being prepared for western blot  
479 analysis.

#### 480 **Mice**

482 For the endothelial deletion of *Ptbp1*, *Cdh5(PAC)-CreERT2* and *Ptbp1<sup>lox/lox</sup>* mice were used, which have been  
483 previously described<sup>2221</sup>. They were intercrossed to create the *Ptbp1* EC-KO mice (*Cdh5(PAC)-CreERT2*;  
484 *Ptbp1<sup>lox/lox</sup>*) and littermate controls (*Ptbp1<sup>lox/lox</sup>*) used here. Mice were used between 2 and 7 months of age  
485 in paired groups of males and females. Tamoxifen (Sigma) was delivered intraperitoneally, dissolved at  
486 10mg/mL in sunflower oil. 1mg was given in each of three doses.

488 All mice were housed and handled in accordance with protocols approved by the University of Connecticut  
489 Health Center for Comparative Medicine.

#### 490 **Hyperlipidemia**

492 Mice received 100 µl intraperitoneal injections of  $1 \times 10^{11}$  viral particles of AAV8-encoding mutant PCSK9  
493 (pAAV/D377Y-mPCSK9) produced at the Gene Transfer Vector Core (Grousbeck Gene Therapy Center,  
494 Harvard Medical School). Mice were then placed on the Clinton/Cybulsky high-fat rodent diet (HFD) with  
495 regular casein and 1.25% added cholesterol (D12108C; Research Diets). To measure cholesterol levels,  
496 blood was collected from the right ventricle into lithium-heparinized tubes (365965; BD Biosciences) and  
497 centrifuged at 5,000 g for 10 min to obtain serum. Samples were stored at -80°C and analyzed by the Total  
498 Cholesterol Assay Kit (INC, cat. no. STA-384; Cell Biolabs).

499

## 500 **Aortic digestion**

501 Vessels were flushed with phosphate-buffered saline (PBS) through the left ventricle and out the right  
502 atrium and then dissected free of adventitial tissue, minced with scissors into 1.5 ml microcentrifuge tubes  
503 (Eppendorf), and incubated for 1 hour at 37°C with gentle rotation (20 rpm) in balanced salt solution (BSS)  
504 media containing 150 U/ml collagenase type IV (Sigma-Aldrich C5138), 60 U/ml DNase I (Sigma-Aldrich), 1  
505  $\mu\text{M}$   $\text{MgCl}_2$  (Sigma Aldrich), 1  $\mu\text{M}$   $\text{CaCl}_2$  (Sigma-Aldrich), and 5% fetal bovine serum (FBS). Digested tissues  
506 were crushed through 35  $\mu\text{m}$  cell-strainer caps (BD Biosciences) and quenched with 5 ml of cold BSS + 10%  
507 FBS in round-bottom tubes. Supernatant was removed after a 5 minute, 320 *g* centrifugation, and the cell  
508 pellet was resuspended and quantified using a Z1 particle counter (Beckman Coulter).

509

## 510 **Flow cytometry**

### 511 **Aortic digestion and analysis**

512 Vessels were flushed with phosphate-buffered saline (PBS) through the left ventricle and out the right  
513 atrium and then dissected free of adventitial tissue, minced with scissors into 1.5-ml Eppendorfs, and  
514 incubated for 1 h at 37°C with gentle rotation (20 rpm) in balanced salt solution (BSS) media containing 150  
515 U/ml collagenase type IV (Sigma-Aldrich C5138), 60 U/ml DNase I (Sigma-Aldrich), 1  $\mu\text{M}$   $\text{MgCl}_2$  (Sigma  
516 Aldrich), 1  $\mu\text{M}$   $\text{CaCl}_2$  (Sigma-Aldrich), and 5% fetal bovine serum (FBS). Digested tissues were crushed  
517 through 35- $\mu\text{m}$  cell-strainer caps (BD Biosciences) and quenched with 5 ml of cold BSS + 10% FBS in round-  
518 bottom tubes. Supernatant was removed after a 5-min, 320-*g* centrifuge, and the cell pellet was  
519 resuspended and quantified using a Z1 particle counter (Beckman Coulter).

520

### 521 **Flow Cytometry Staining**

522 Samples were stained in 2%FBS with 1mM EDTA in PBS, with the following: LIVE/DEAD UV Blue (1:100,  
523 L34962, ThermoFisher), CD8 (1:200, Biolegend, 100708, clone 53-6.7), CD4 (1:200, Biolegend 100536, clone  
524 RM4-5), CD45.2 (1:200, Biolegend, 103116, clone 30-F1111), Cd3e (1:200, Biolegend, 100348, clone 145-  
525 2C11), Gr1 (1:200, B.D. Pharmingen, 552093, clone RB6-8C5), and Cd11b (1:200, Biolegend, 10112, clone  
526 M1/70). LSR Aria-IIA (BD Biosciences) was used for acquisition. Viable cell gate is representative of a size  
527 gate, single-cell gate, and viability gate.

528

529 Acquisition was performed on an LSR analyzer (Becton Dickinson). All flow cytometry data were analyzed  
530 with FlowJo (Tree Star, Ashland, OR).

531

## 532 **Histology**

533 Innominate arteries were harvested and placed cores before being placed in Zinc-formalin fix for 24 hours.  
534 24 hours later, cores were moved into 70% ethanol solution. Innominate arteries were then paraffin  
535 infused, before being embedded in paraffin. 5um tissue sections were cut for each mouse. Lung tissues  
536 were harvested and placed in PBS before being put in 4% paraformaldehyde (PFA) + 5% sucrose overnight  
537 at 4°C. Tissues were then embedded in OCT before being sectioned in 5um sections.

538

## 539 **Analysis of GTEX data**

540 GTEX (version 7) was used <sup>43</sup>. Pathology was determined from the provided sample tables. Terms “some  
541 intimal thickening”, “no lesions”, “no plaques”, “no significant atherosclerosis” were linked to the group  
542 “Low Plaque”. Terms “mild plaques”, “minimal plaques”, “mild atherosclerosis”, “atherosclerosis”,  
543 “atherosis”, etc. were linked to the group “High Plaque”. Gene-gene correlations were performed in R  
544 using gene level transcript expression table, using the “cor” function. Gene set enrichment analysis was

545 performed using the desktop version of GSEA and a preranked list of genes correlated with Ptbp1 (most to  
546 least), as a weighted analysis<sup>44</sup>.

547  
548 **Analysis of Gene Expression and Splicing**

549 RNA was isolated from fixed nuclei using an RNAeasy kit (RNAeasy, Qiagen 74104) with on column DNase  
550 treatment. For RNA-sequencing, samples were prepared for library preparation using TruSeq RNA Library  
551 Prep Kit v2 (Illumina). Total RNA was quantified and purity ratios determined for each sample using the  
552 NanoDrop 2000 spectrophotometer (Thermo Fisher Scientific, Waltham, MA, USA). To further assess RNA  
553 quality, total RNA was analyzed on the Agilent TapeStation 4200 (Agilent Technologies, Santa Clara, CA,  
554 USA) using the RNA High Sensitivity assay. Amplified libraries were validated for length and adapter dimer  
555 removal using the Agilent TapeStation 4200 D1000 High Sensitivity assay (Agilent Technologies, Santa Clara,  
556 CA, USA) then quantified and normalized using the dsDNA High Sensitivity Assay for Qubit 3.0 (Life  
557 Technologies, Carlsbad, CA, USA).

558  
559 Sample libraries were prepared for Illumina sequencing by denaturing and diluting the libraries per  
560 manufacturer's protocol (Illumina, San Diego, CA, USA). All samples were pooled into one sequencing pool,  
561 equally normalized, and run as one sample pool across the Illumina NovaSeq. Target read depth was  
562 achieved per sample with paired end 150bp reads.

563  
564 Paired-end FASTQ files were processed using Whippet (Julia 0.6.4 and Whippet v0.11) using default  
565 settings, after generating an index from GRCm38.primary\_assembly.genome.fa.gz and  
566 gencode.vM23.annotation.gtf.gz (Gencode, M23). Psi files and read support were used to select only  
567 splicing events with read coverage >5 across all replicates. Tpm files were used to examine expression  
568 level. ggSashimi was used to plot alternative splicing events identified by Whippet analysis.

569

## Key Resources Table

| Reagent Type        | Description                      | Source                                                                                            | Identifier |
|---------------------|----------------------------------|---------------------------------------------------------------------------------------------------|------------|
| Vector              | LentiCRISPR_v2                   | Addgene                                                                                           |            |
| Packaging Plasmid   | Delta 8.9                        |                                                                                                   |            |
| Packaging Plasmid   | CMV-Eco                          | Addgene                                                                                           |            |
| Vector              | pLV-EF1a-IRES-Blast              | Addgene                                                                                           |            |
| Software, algorithm | Mageck-0.5.6                     | SourceForge                                                                                       |            |
| Software, algorithm | Whippet                          | GitHub                                                                                            |            |
| Software, algorithm | GSEA                             | <a href="http://www.gsea-msigdb.org/gsea/index.jsp">http://www.gsea-msigdb.org/gsea/index.jsp</a> |            |
| Database            | GTEX                             | <a href="http://www.gtexportal.org">http://www.gtexportal.org</a>                                 | Version 7  |
| Software, algorithm | Whippet                          | <a href="http://www.omictools.com">http://www.omictools.com</a>                                   |            |
| Software            | ImageJ                           | <a href="http://imagej.nih.gov">http://imagej.nih.gov</a>                                         |            |
| Software            | Zen Pro 2.6 (Blue)               | Zeiss                                                                                             |            |
| Software            | FlowJo                           | BD Biosciences                                                                                    |            |
| Bacterial cells     | Stbl3                            | ThermoFisher                                                                                      |            |
| Bacterial cells     | Stbl4                            | ThermoFisher                                                                                      |            |
| Commercial kit      | Plasmid Miniprep                 | Zymo                                                                                              | D4208      |
| Commercial kit      | Plasmid Maxiprep                 | Zymo                                                                                              | D4202      |
| Commercial kit      | Gel Cleanup                      | Zymo                                                                                              | D4007      |
| Commercial kit      | Nuclei Isolation                 | Sigma                                                                                             | NUC101     |
| Commercial kit      | Total Cholesterol Assay kit      | Cell Biolabs                                                                                      | STA-384    |
| Mouse Line          | Ptbp1 Mice                       | Institute of Medical Science, University of Tokyo, Tokyo, Japan                                   |            |
| Mouse Line          | C57BL/6J                         | Jackson Lab                                                                                       |            |
| Mouse Line          | Cdh5(PAC)-CreERT2                | Jackson Lab                                                                                       |            |
| Antibody            | Anti-CD45.2                      | Biologend                                                                                         | 103116     |
| Antibody            | Anti-CD3e                        | Biologend                                                                                         | 100348     |
| Antibody            | Anti-CD4                         | Biologend                                                                                         | 100536     |
| Antibody            | Anti-CD8                         | Biologend                                                                                         | 100708     |
| Antibody            | Anti-Gr1                         | B.D. Pharmingen                                                                                   | 552093     |
| Antibody            | Anti-CD11b                       | Biologend                                                                                         | 10112      |
| Antibody            | Live/dead                        | ThermoFisher                                                                                      | L34962     |
| Antibody            | Anti-Ptbp1                       | Abcam                                                                                             | 133734     |
| Antibody            | Anti-Icam1                       | Biologend                                                                                         | 116108     |
| Antibody            | Anti-Vcam1                       | Biologend                                                                                         | 105718     |
| Antibody            | Anti-NFkB                        | Cell Signaling Technology                                                                         | 8242       |
| Antibody            | Anti-Ikbkg (NEMO)                | Abcam                                                                                             | ab178872   |
| Antibody            | Anti-Tnfr1                       | Abcam                                                                                             | ab19139    |
| Antibody            | Anti-IKba                        | Cell Signaling Technology                                                                         | 4814       |
| Antibody            | Anti-IKba-p                      | Cell Signaling Technology                                                                         | 2859       |
| Reagent             | Phosphatase Inhibitor Cocktail 2 | Sigma                                                                                             | P5726      |
| Reagent             | Phosphatase Inhibitor            | Sigma                                                                                             | P0044      |

|         |                                                   |        |         |
|---------|---------------------------------------------------|--------|---------|
|         | Cocktail 3                                        |        |         |
| Reagent | Benzonase                                         | Sigma  | E1014   |
| Reagent | Clarity Western Blot ECL Substrate                | Biorad | 1705060 |
| Reagent | Collagenase Type IV from Clostridium Histolyticum | Sigma  | C5138   |
| Reagent | DNase I                                           | Sigma  | DN25    |

570

571

572

#### Acknowledgements:

573

574

575

576

577

578

579

580

581

582

#### Competing Interests:

583

584

585

#### References:

586

587

588

589

590

591

592

593

594

595

596

1. Ley, K., Laudanna, C., Cybulsky, M. I. & Nourshargh, S. Getting to the site of inflammation: the leukocyte adhesion cascade updated. *Nat Rev Immunol* **7**, 678–89 (2007).
2. Gimbrone, M. A. & Garcia-Cardena, G. Endothelial Cell Dysfunction and the Pathobiology of Atherosclerosis. *Circ Res* **118**, 620–36 (2016).
3. Gareus, R. *et al.* Endothelial cell-specific NF-kappaB inhibition protects mice from atherosclerosis. *Cell Metab* **8**, 372–83 (2008).
4. Hajra, L. *et al.* The NF-kappa B signal transduction pathway in aortic endothelial cells is primed for activation in regions predisposed to atherosclerotic lesion formation. *Proc Natl Acad Sci U A* **97**, 9052–7 (2000).
5. Dai, G. *et al.* Distinct endothelial phenotypes evoked by arterial waveforms derived from atherosclerosis-susceptible and -resistant regions of human vasculature. *Proc Natl Acad Sci U A* **101**, 14871–6 (2004).



- 597 6. Orr, A. W. *et al.* The subendothelial extracellular matrix modulates NF-kappaB activation by flow: a  
598 potential role in atherosclerosis. *J Cell Biol* **169**, 191–202 (2005).
- 599 7. Al-Yafeai, Z. *et al.* Endothelial FN (Fibronectin) Deposition by alpha5beta1 Integrins Drives Atherogenic  
600 Inflammation. *Arter. Thromb Vasc Biol* **38**, 2601–2614 (2018).
- 601 8. Feaver, R. E., Gelfand, B. D., Wang, C., Schwartz, M. A. & Blackman, B. R. Atheroprone hemodynamics  
602 regulate fibronectin deposition to create positive feedback that sustains endothelial inflammation. *Circ*  
603 *Res* **106**, 1703–11 (2010).
- 604 9. Murphy, P. A. *et al.* Alternative RNA splicing in the endothelium mediated in part by Rbfox2 regulates the  
605 arterial response to low flow. *Elife* **7**, (2018).
- 606 10. Murphy, P. A. *et al.* Alternative Splicing of FN (Fibronectin) Regulates the Composition of the Arterial  
607 Wall Under Low Flow. *Arterioscler. Thromb. Vasc. Biol.* **41**, e18–e32 (2021).
- 608 11. Massberg, S. *et al.* A critical role of platelet adhesion in the initiation of atherosclerotic lesion  
609 formation. *J Exp Med* **196**, 887–96 (2002).
- 610 12. Massberg, S. *et al.* Platelet adhesion via glycoprotein IIb integrin is critical for atheroprogession and  
611 focal cerebral ischemia: an in vivo study in mice lacking glycoprotein IIb. *Circulation* **112**, 1180–1188  
612 (2005).
- 613 13. Burger, P. C. & Wagner, D. D. Platelet P-selectin facilitates atherosclerotic lesion development. *Blood*  
614 **101**, 2661–2666 (2003).
- 615 14. Huo, Y. *et al.* Circulating activated platelets exacerbate atherosclerosis in mice deficient in  
616 apolipoprotein E. *Nat Med* **9**, 61–7 (2003).
- 617 15. Henn, V. *et al.* CD40 ligand on activated platelets triggers an inflammatory reaction of endothelial cells.  
618 *Nature* **391**, 591–594 (1998).
- 619 16. Leclair, N. K. *et al.* Poison Exon Splicing Regulates a Coordinated Network of SR Protein Expression  
620 during Differentiation and Tumorigenesis. *Mol. Cell* **80**, 648–665.e9 (2020).

- 521 17. Zhang, L. *et al.* Novel Pathological Role of hnRNPA1 (Heterogeneous Nuclear Ribonucleoprotein A1) in  
522 Vascular Smooth Muscle Cell Function and Neointima Hyperplasia. *Arterioscler. Thromb. Vasc. Biol.* **37**,  
523 2182–2194 (2017).
- 524 18. Llorian, M. *et al.* Position-dependent alternative splicing activity revealed by global profiling of  
525 alternative splicing events regulated by PTB. *Nat. Struct. Mol. Biol.* **17**, 1114–1123 (2010).
- 526 19. Xue, Y. *et al.* Genome-wide analysis of PTB-RNA interactions reveals a strategy used by the general  
527 splicing repressor to modulate exon inclusion or skipping. *Mol. Cell* **36**, 996–1006 (2009).
- 528 20. Wilson, A. A. *et al.* Lentiviral delivery of RNAi for in vivo lineage-specific modulation of gene expression  
529 in mouse lung macrophages. *Mol. Ther. J. Am. Soc. Gene Ther.* **21**, 825–833 (2013).
- 530 21. Sorensen, I., Adams, R. H. & Gossler, A. DLL1-mediated Notch activation regulates endothelial identity  
531 in mouse fetal arteries. *Blood* **113**, 5680–8 (2009).
- 532 22. Shibasaki, T. *et al.* PTB deficiency causes the loss of adherens junctions in the dorsal telencephalon and  
533 leads to lethal hydrocephalus. *Cereb Cortex* **23**, 1824–35 (2013).
- 534 23. Roche-Molina, M. *et al.* Induction of sustained hypercholesterolemia by single adeno-associated virus-  
535 mediated gene transfer of mutant hPCSK9. *Arterioscler. Thromb. Vasc. Biol.* **35**, 50–59 (2015).
- 536 24. Monzón-Casanova, E. *et al.* Polypyrimidine tract-binding proteins are essential for B cell development.  
537 *eLife* **9**, (2020).
- 538 25. Monzón-Casanova, E. *et al.* The RNA-binding protein PTBP1 is necessary for B cell selection in germinal  
539 centers. *Nat. Immunol.* **19**, 267–278 (2018).
- 540 26. David, C. J., Chen, M., Assanah, M., Canoll, P. & Manley, J. L. HnRNP proteins controlled by c-Myc  
541 deregulate pyruvate kinase mRNA splicing in cancer. *Nature* **463**, 364–368 (2010).
- 542 27. Georgilis, A. *et al.* PTBP1-Mediated Alternative Splicing Regulates the Inflammatory Secretome and the  
543 Pro-tumorigenic Effects of Senescent Cells. *Cancer Cell* **34**, 85–102 e9 (2018).

- 544 28. La Porta, J., Matus-Nicodemos, R., Valentín-Acevedo, A. & Covey, L. R. The RNA-Binding Protein,  
545 Polypyrimidine Tract-Binding Protein 1 (PTBP1) Is a Key Regulator of CD4 T Cell Activation. *PLoS One* **11**,  
546 e0158708 (2016).
- 547 29. Jodo, A., Shibazaki, A., Onuma, A., Kaisho, T. & Tanaka, T. PDLIM7 Synergizes With PDLIM2 and  
548 p62/Sqstm1 to Inhibit Inflammatory Signaling by Promoting Degradation of the p65 Subunit of NF- $\kappa$ B.  
549 *Front. Immunol.* **11**, 1559 (2020).
- 550 30. Flanagan, S. E. *et al.* Activating germline mutations in STAT3 cause early-onset multi-organ autoimmune  
551 disease. *Nat. Genet.* **46**, 812–814 (2014).
- 552 31. Nakamura, R. *et al.* A multi-ethnic meta-analysis identifies novel genes, including ACSL5, associated  
553 with amyotrophic lateral sclerosis. *Commun. Biol.* **3**, 526 (2020).
- 554 32. Julià, A. *et al.* A deletion at ADAMTS9-MAGI1 locus is associated with psoriatic arthritis risk. *Ann.*  
555 *Rheum. Dis.* **74**, 1875–1881 (2015).
- 556 33. Angarola, B. L. & Anczuków, O. Splicing alterations in healthy aging and disease. *Wiley Interdiscip. Rev.*  
557 *RNA* e1643 (2021) doi:10.1002/wrna.1643.
- 558 34. Childs, B. G. *et al.* Senescent intimal foam cells are deleterious at all stages of atherosclerosis. *Science*  
559 **354**, 472–477 (2016).
- 560 35. Bent, E. H., Gilbert, L. A. & Hemann, M. T. A senescence secretory switch mediated by PI3K/AKT/mTOR  
561 activation controls chemoprotective endothelial secretory responses. *Genes Dev* **30**, 1811–21 (2016).
- 562 36. Rossman, M. J. *et al.* Endothelial cell senescence with aging in healthy humans: prevention by habitual  
563 exercise and relation to vascular endothelial function. *Am J Physiol Heart Circ Physiol* **313**, H890–H895  
564 (2017).
- 565 37. Babic, I., Sharma, S. & Black, D. L. A role for polypyrimidine tract binding protein in the establishment of  
566 focal adhesions. *Mol. Cell. Biol.* **29**, 5564–5577 (2009).

- 567 38. Murphy, P. A. & Hynes, R. O. Alternative splicing of endothelial fibronectin is induced by disturbed  
568 hemodynamics and protects against hemorrhage of the vessel wall. *Arter. Thromb Vasc Biol* **34**, 2042–  
569 50 (2014).
- 570 39. Rohwedder, I. *et al.* Plasma fibronectin deficiency impedes atherosclerosis progression and fibrous cap  
571 formation. *EMBO Mol Med* **4**, 564–76 (2012).
- 572 40. Yurdagul, A. *et al.*  $\alpha 5\beta 1$  integrin signaling mediates oxidized low-density lipoprotein-induced  
573 inflammation and early atherosclerosis. *Arterioscler. Thromb. Vasc. Biol.* **34**, 1362–1373 (2014).
- 574 41. Han, X. *et al.* Using Mendelian randomization to evaluate the causal relationship between serum C-  
575 reactive protein levels and age-related macular degeneration. *Eur. J. Epidemiol.* **35**, 139–146 (2020).
- 576 42. Doench, J. G. *et al.* Optimized sgRNA design to maximize activity and minimize off-target effects of  
577 CRISPR-Cas9. *Nat Biotechnol* **34**, 184–191 (2016).
- 578 43. GTEx Consortium. The GTEx Consortium atlas of genetic regulatory effects across human tissues.  
579 *Science* **369**, 1318–1330 (2020).
- 580 44. Subramanian, A. *et al.* Gene set enrichment analysis: a knowledge-based approach for interpreting  
581 genome-wide expression profiles. *Proc Natl Acad Sci U A* **102**, 15545–50 (2005).

582
